# Supplementary material for: Separation of breast cancer and organ microenvironment transcriptomes in metastases
Source: PubMed Central journal article supplement (PMC6404325; doi:10.1186/s13058-019-1123-2), 2019-03-06

a

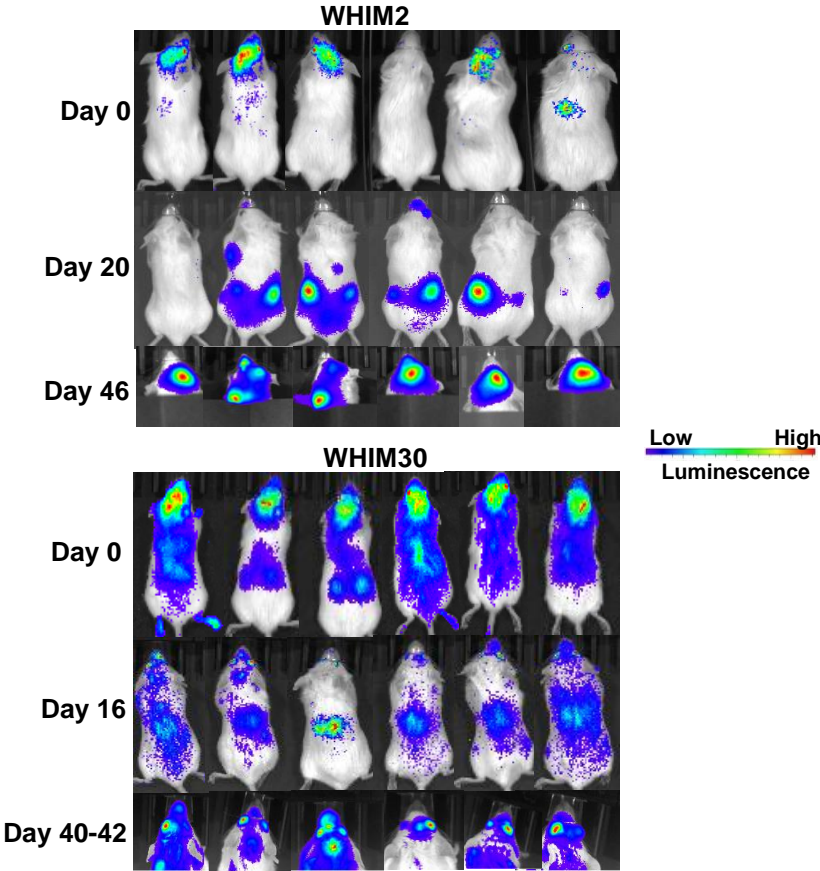

b

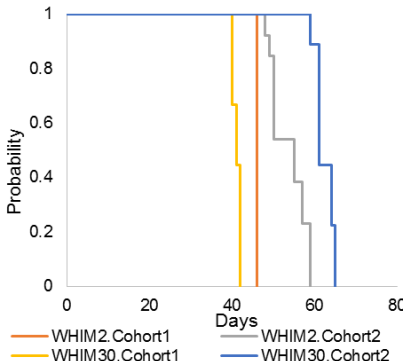

Supplement: 13058_2019_1123_MOESM3_ESM.pdf [file 13058_2019_1123_MOESM3_ESM.pdf]
