# Supplementary material for: Separation of breast cancer and organ microenvironment transcriptomes in metastases
Source: PubMed Central journal article supplement (PMC6404325; doi:10.1186/s13058-019-1123-2), 2019-03-06
Supplement: 13058_2019_1123_MOESM4_ESM.pdf [file 13058_2019_1123_MOESM4_ESM.pdf]

# Additional File 4

| PDX    | Organs of relapse                      |                                                  |                                                       |
|--------|----------------------------------------|--------------------------------------------------|-------------------------------------------------------|
|        | Patient metastases                     | PDX-metastases from mammary tumor                | PDX-metastases after tail-vein                        |
| HCI01  | lung                                   | liver, lung, lymph node                          | liver, ovary                                          |
| HCI02  | lymph node                             | lung, lymph node                                 | liver, lung                                           |
| HCI03  | lymph node                             | liver, lung, lymph node                          | not determined                                        |
| HCI04  | not detected                           | not detected                                     | not detected                                          |
| HCI08  | lung, skin                             | lung                                             | lung                                                  |
| HCI09  | bone, lymph node, pancreas, peritoneum | liver, lung, lymph node                          | liver, lung, ovary                                    |
| HCI10  | lung                                   | brain, liver, lymph node, lung, ovary            | brain, liver, lung, ovary                             |
| HCI11  | lymph node, pleura                     | lung                                             | brain, liver, lymph node, lung                        |
| HCI13  | liver, lung, pericardium               | brain, lung                                      | lung, lymph node                                      |
| HCI16  | unknown                                | not detected                                     | not detected                                          |
| UCD18  | unknown                                | not detected                                     | not detected                                          |
| UCD52  | unknown                                | lymph node, lung                                 | uterus                                                |
| WHIM2  | brain, bone, lymph nodes               | brain, liver, lymph nodes, ovary, salivary gland | brain, liver, lung, lymph node, ovary, salivary gland |
| WHIM30 | not detected                           | brain, liver, lung                               | brain, liver, lung                                    |
