# Supplementary material for: Separation of breast cancer and organ microenvironment transcriptomes in metastases
Source: Springer Nature journal article supplement (doi:10.1186/s13058-019-1123-2), 2019-03-06

**Additional File 5**

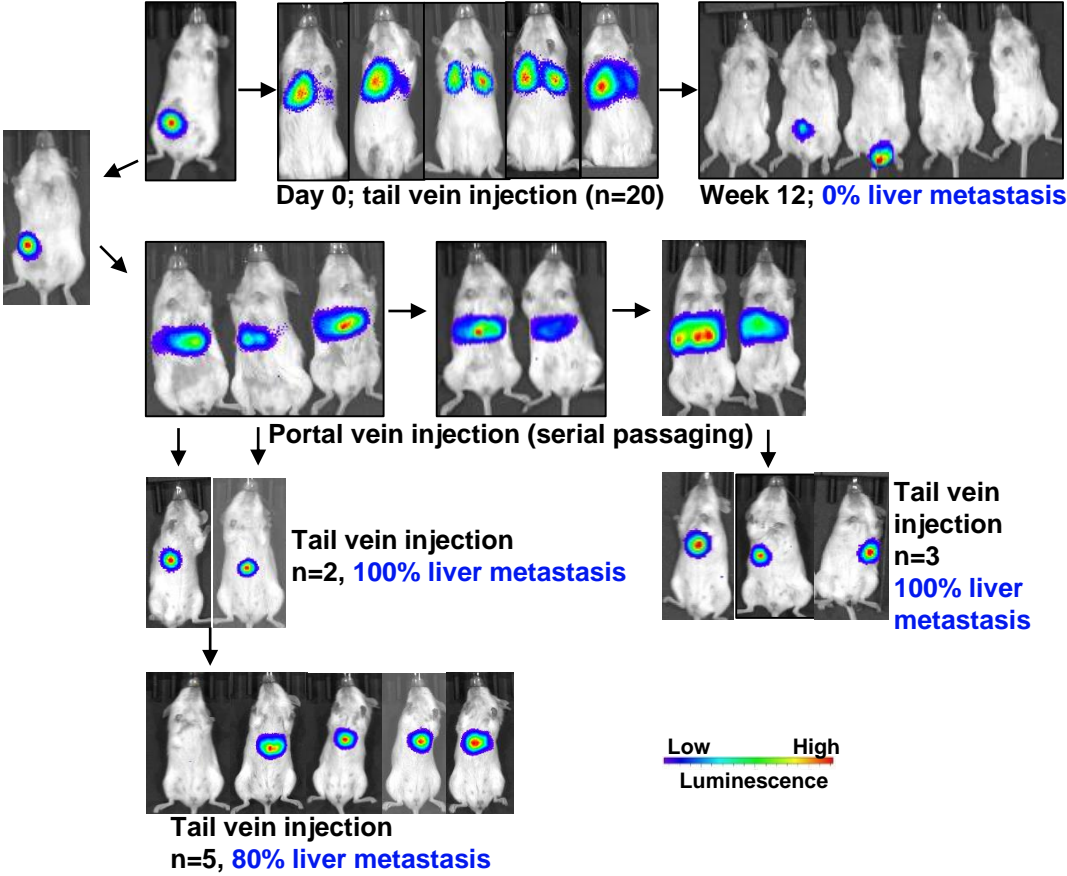

Supplement: MOESM5 [file 16529958]
