# Supplementary material for: Separation of breast cancer and organ microenvironment transcriptomes in metastases
Source: Springer Nature journal article supplement (doi:10.1186/s13058-019-1123-2), 2019-03-06
Supplement: MOESM7 [file 16529958]

# Additional File 7

## Genes upregulated in TNBC liver metastases (human cancer genome)

**a**

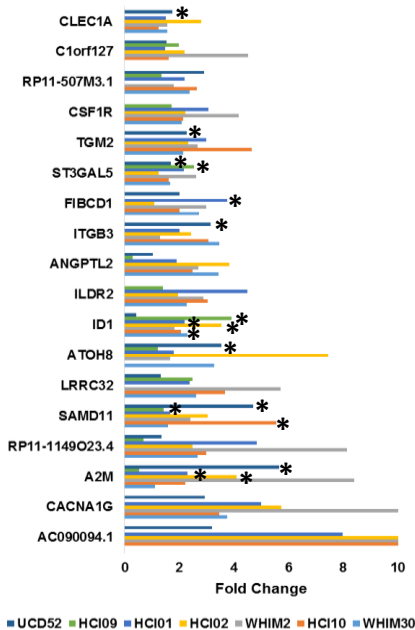

## Genes upregulated in TNBC liver metastases (mouse liver genome)

**c**

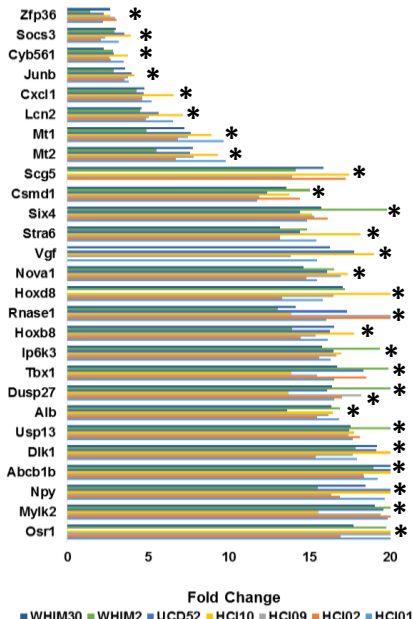

**b**

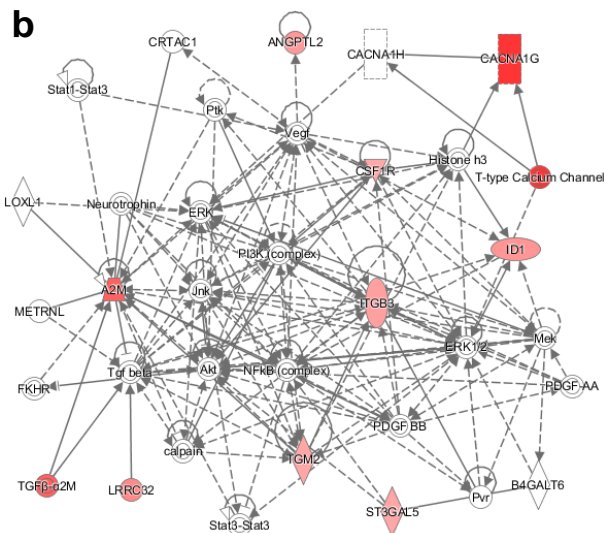

### ▼ Diseases and Disorders

| Name                                | p-value range       |
|-------------------------------------|---------------------|
| Cancer                              | 1.10E-02 - 1.09E-05 |
| Organismal Injury and Abnormalities | 1.10E-02 - 1.09E-05 |
| Tumor Morphology                    | 2.77E-03 - 1.09E-05 |
| Connective Tissue Disorders         | 1.10E-02 - 4.06E-05 |
| Skeletal and Muscular Disorders     | 1.10E-02 - 4.06E-05 |

**d**

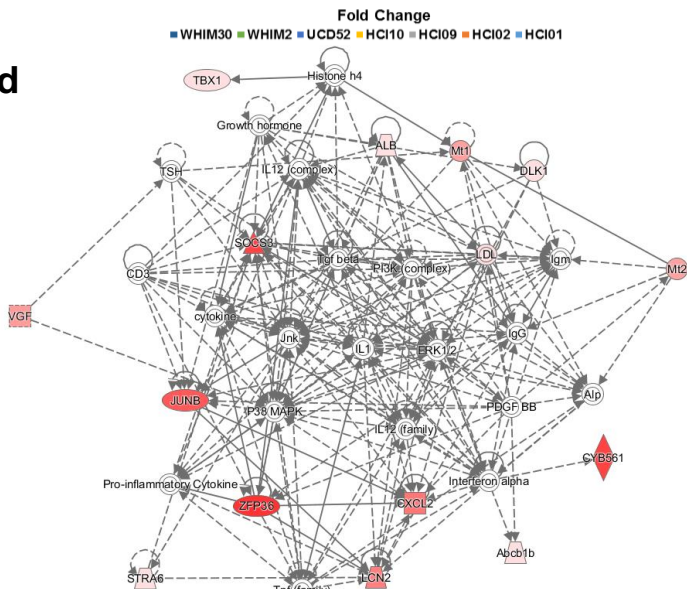

### ▼ Diseases and Disorders

| Name                                | p-value range       |
|-------------------------------------|---------------------|
| Inflammatory Response               | 5.82E-03 - 8.88E-07 |
| Organismal Injury and Abnormalities | 6.14E-03 - 1.46E-06 |
| Renal and Urological Disease        | 5.82E-03 - 1.46E-06 |
| Nutritional Disease                 | 3.69E-03 - 1.72E-06 |
| Cancer                              | 6.14E-03 - 1.97E-06 |
