# Supplementary material for: Separation of breast cancer and organ microenvironment transcriptomes in metastases
Source: Springer Nature journal article supplement (doi:10.1186/s13058-019-1123-2), 2019-03-06

**Genes upregulated in TNBC lung metastases (human)**

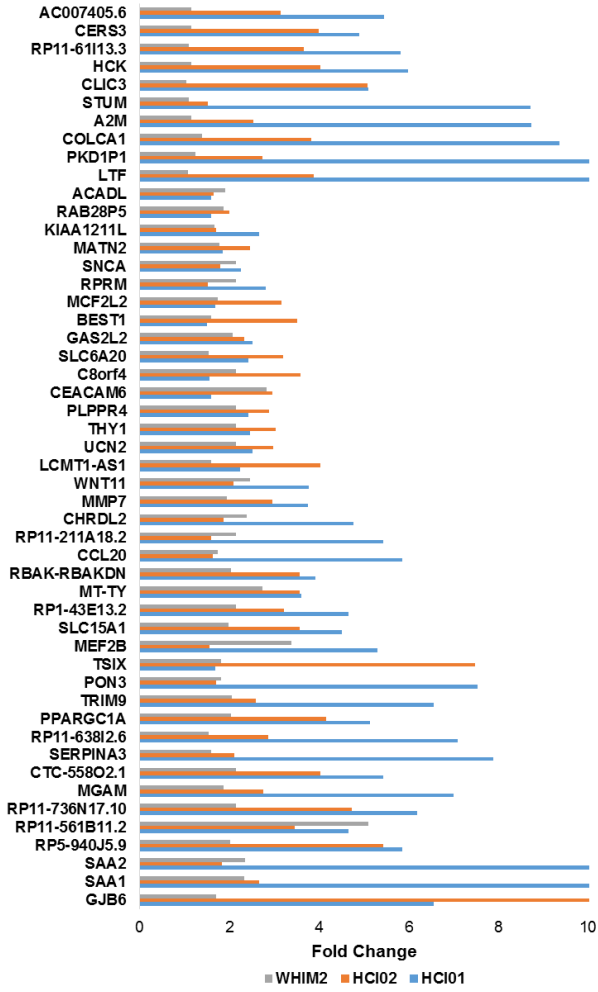

**Genes upregulated in TNBC lung metastases (mouse)**

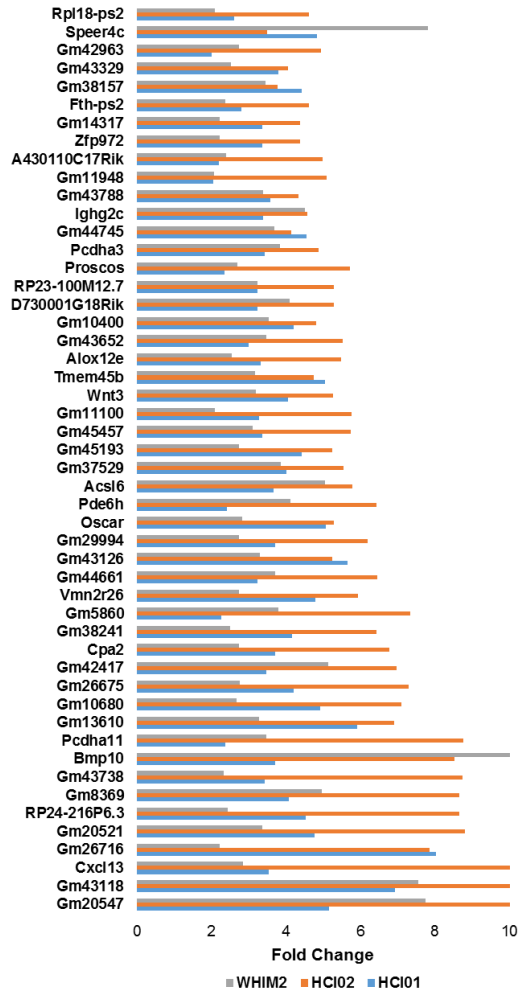

Supplement: MOESM9 [file 16529958]
